# Supplementary material
Source: Springer Nature journal article supplement (https://www.springermedizin.de/resource/supplementary/12913_2013_3439_MOESM1_ESM.pdf/9532810)
Supplement: MOESM1 [file 9532810]

Records identified through database searching (n = 128)

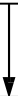

Records screened after duplicates removed (n = 116)

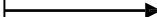

Records excluded by title and abstract  
No telehealth (n = 65)  
Review (n = 5)  
Decision modelling (n = 10)  
Protocols (n = 9)

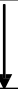

Full-text articles assessed (n = 27)

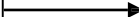

Full-text articles excluded  
No telehealth (n = 8)  
No primary QALY data (n = 2)

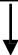

Studies included (n = 17)
